# Supplementary material for: Distinct Roles of Velvet Complex in the Development, Stress Tolerance, and Secondary Metabolism in Pestalotiopsis microspora, a Taxol Producer
Source: PubMed Central journal article supplement (PMC5867885; doi:10.3390/genes9030164), 2018-03-14
Supplement: genes-09-00164-s001.pdf [file genes-09-00164-s001.pdf]

## SUPPLEMENTARY MATERIAL:

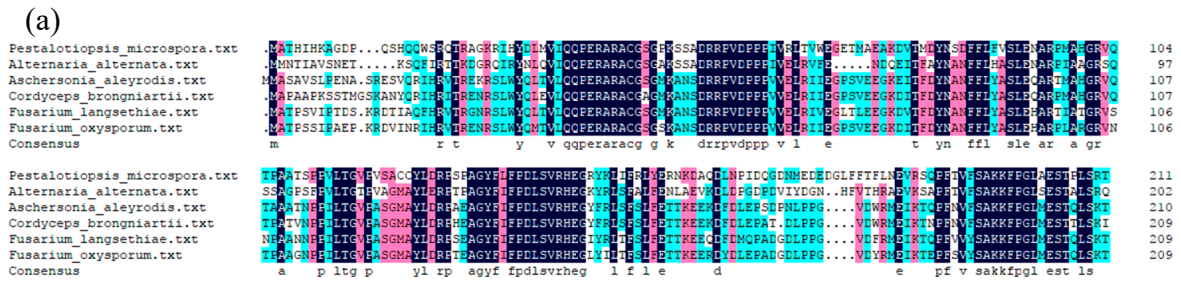

**Figure S1. VeA information.** (a) Alignment of the deduced amino acid sequence of VeA in *P. microspora* and the VeA orthologs in other fungi. The amino acid sequences were aligned using DNAMAN (Version 8.0) software. (b) Schematic of the structure of *veA* encoding protein from *Pestalotiopsis microspora* analyzed by protein basic local alignment search tool (BLASTP) of NCBI (<https://blast.ncbi.nlm.nih.gov>).

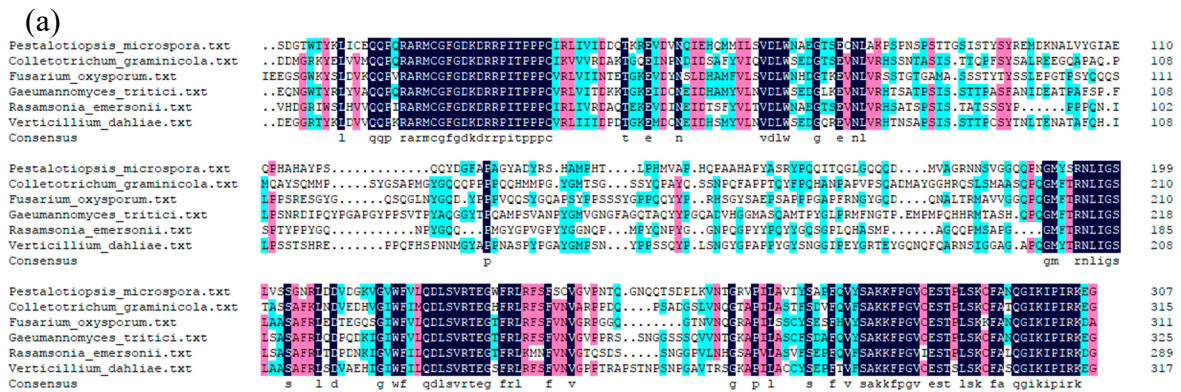

**Figure S2. VelB information.** (a) Alignment of the deduced amino acid sequence of VelB in *P. microspora* and the VelB orthologs in other fungi. The amino acid sequences were aligned using DNAMAN (Version 8.0) software. (b) Schematic of the structure of *velB* encoding protein from *P. microspora* analyzed by BLASTP of NCBI.

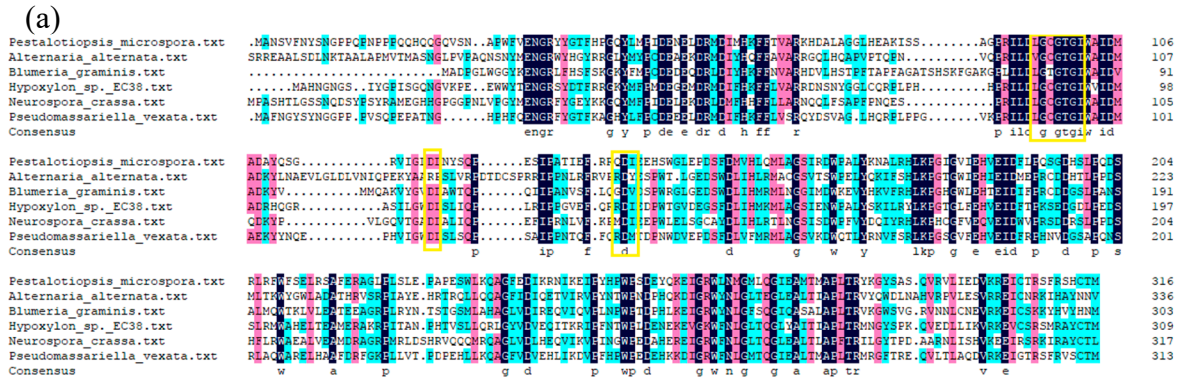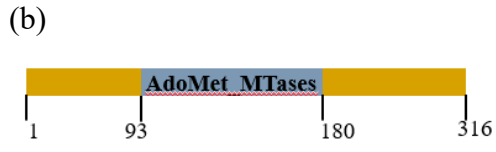

**Figure S3** *LeaA* information. (a) Alignment of the deduced amino acid sequence of *LeaA* in *P. microspora* and the *LeaA* orthologs in other fungi. The amino acid sequences were aligned using DNAMAN (Version 8.0) software. (b) Schematic of the structure of *laeA* encoding protein from *P. microspora* analyzed by BlastP of NCBI. Conserved protein methyltransferase S-adenosylmethionine binding sites are boxed.

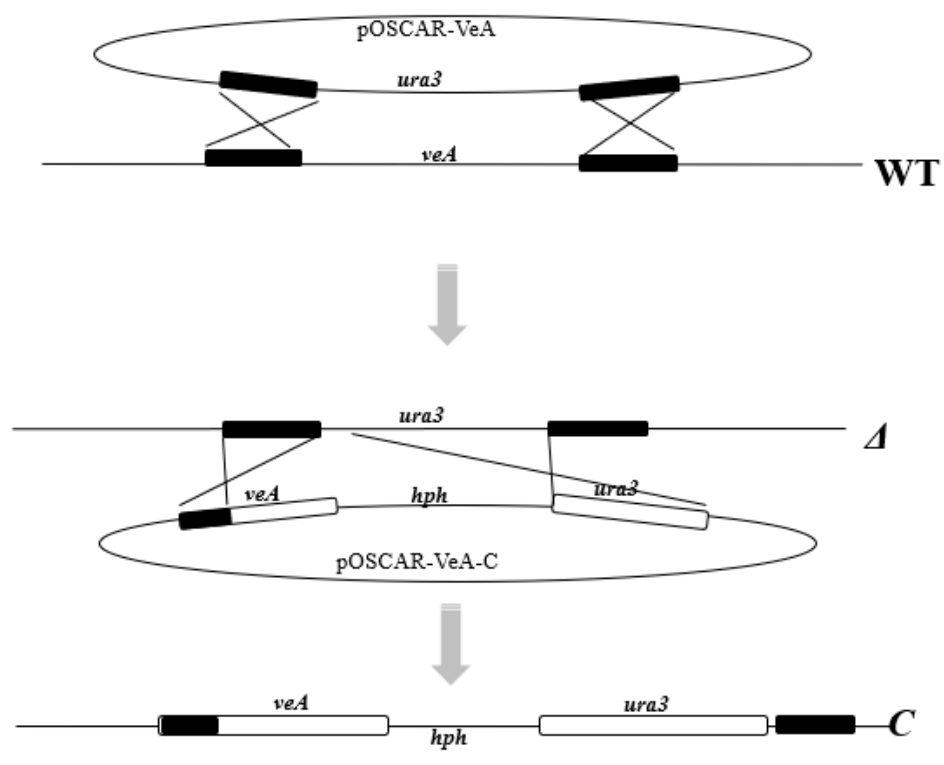

**Figure S4.** Construction of *veA* deletion and complement strains. Diagrams showing the strategy for generating *veA* deletion and complement strains by homologous recombination.

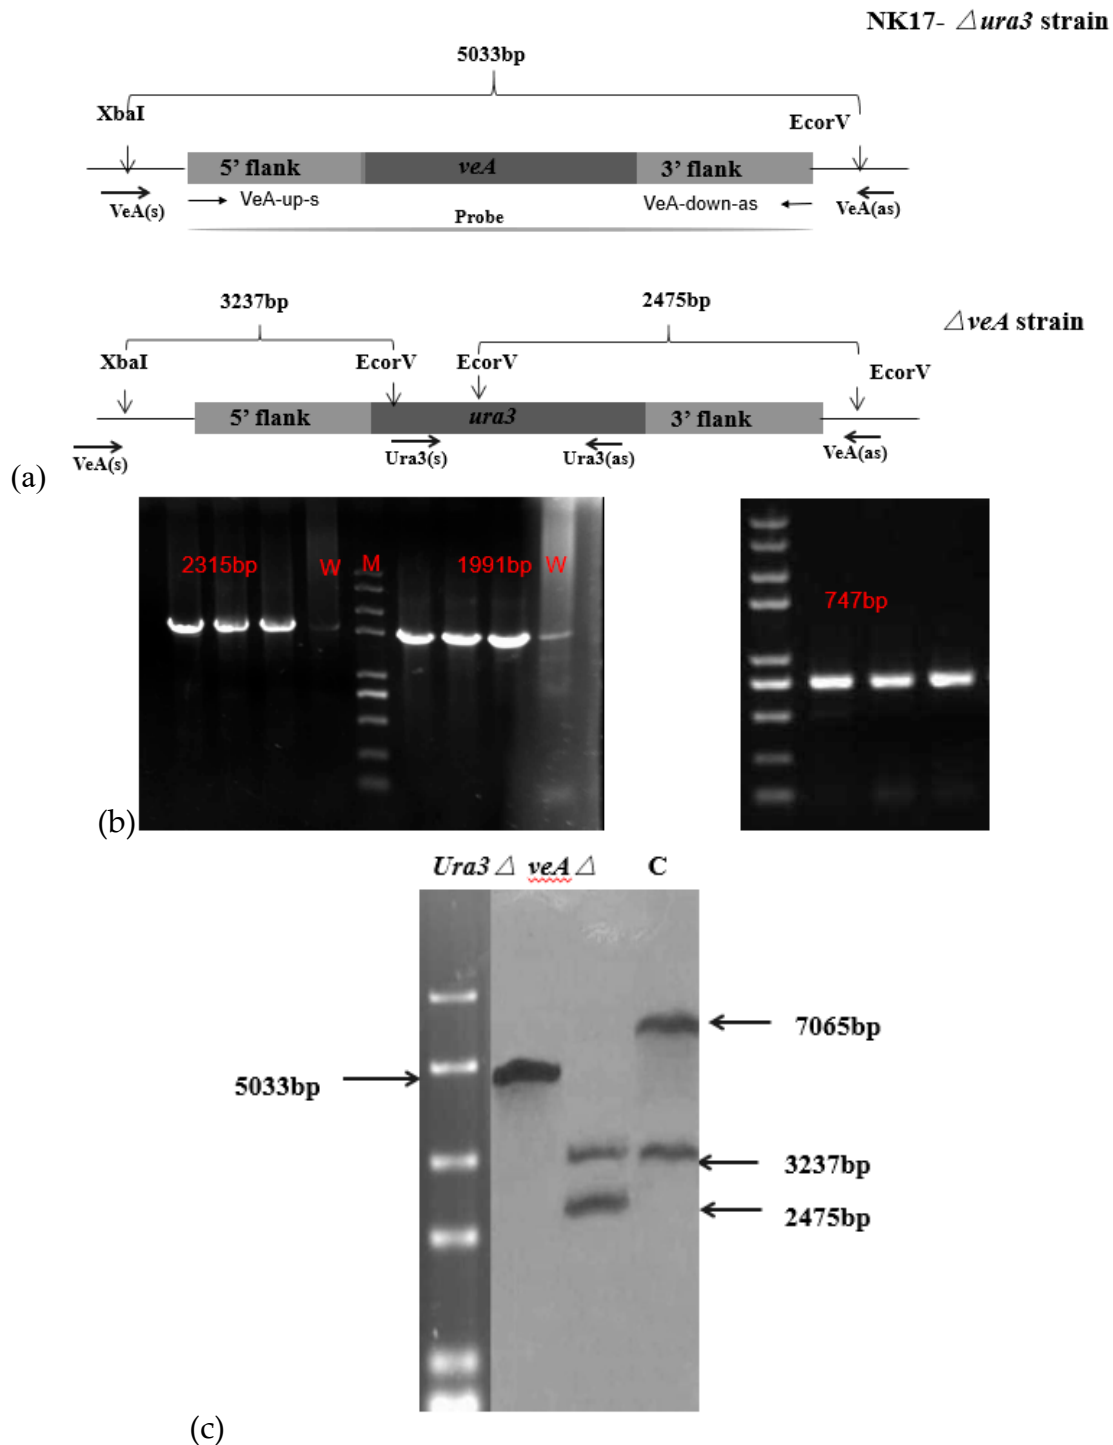

**Figure S5.** Deletion of *veA* in NK17. (a) Schematic of *veA* allele in NK17-*ura3* $\Delta$  and *ura3* in *veA* $\Delta$ . The primers used for PCR confirmation of *veA* $\Delta$ , the location of the recognition sites of Xba I, Ecor V, and the probes used for Southern blot were shown. (b) Screening of *veA* $\Delta$  (top) *veA* $\Delta$  -C transformants by PCR. The expected size of PCR products with primer pairs VeA(s)/Ura3(as) and VeA(as)/Ura3(s) were 2315 bp (left) and 1991 bp (right) for *veA* $\Delta$ , respectively. A pair of primer Hyg(s) and Hyg(as) generated 747 bp sequence in *veA* $\Delta$  -C. M is molecular marker, W presents NK17 strain (Trans2K plusII, TransGen, China). (c) Southern blot analysis of the *veA* $\Delta$  mutant. Genomic DNA from NK17-*ura3* $\Delta$ , *veA* $\Delta$  or *veA* $\Delta$ -C was digested with Xba I and Ecor V, and probed with a 1.7-kb *veA* fragment. Digestion of the NK17-*ura3* $\Delta$  genome yielded a 5.0 kb band, whereas the *veA* $\Delta$  had two bands, 3.2 and 2.5kb in length. Two bands, 3.2 and 7.0 kb were detected for complemented strain *veA* $\Delta$ -C (Schematic of construction of the complemented strain was represented in Figure S4).

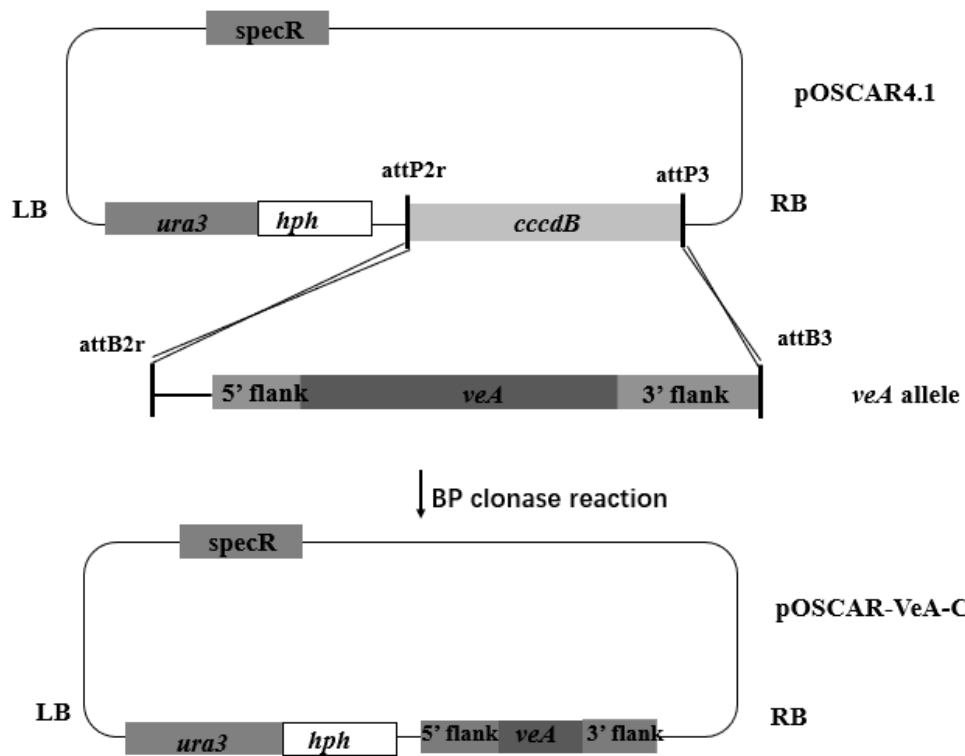

**Figure S6.** Schematic of pOSCAR4.1 and the vector pOSCAR-VeA-C for gene complementation was constructed by BP clonase. Location of primers used to amplify the *veA* allele were indicated.

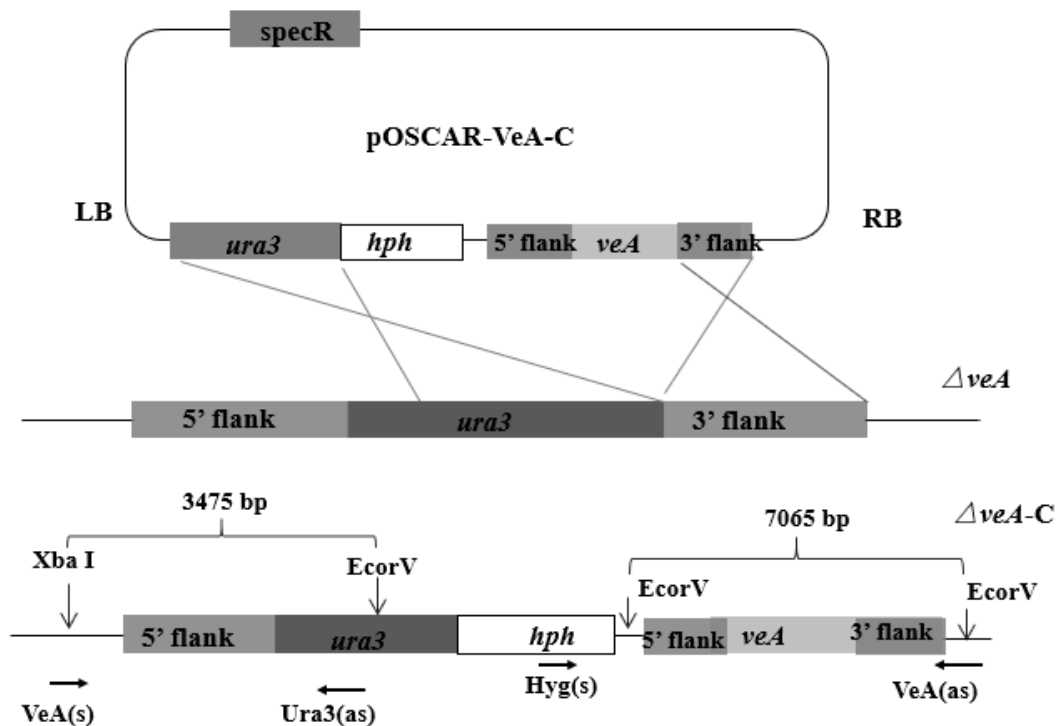

**Figure S7.** Schematic of the complement vector pOSCAR-VeA-C and construction of complemented strain  $\Delta veA-C$ . The location of the recognition sites of *Xba*I and *Ecor*V are indicated.

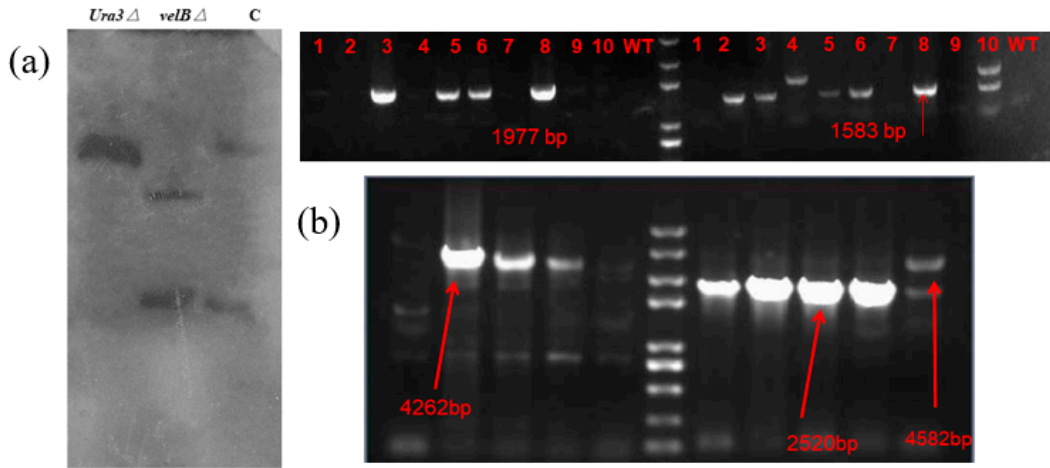

**Figure S8.** (a) Southern blot analysis of the  $\Delta velB$  mutant. Genomic DNA from NK17-  $\Delta ura3$ ,  $\Delta velB$  or  $\Delta velB$ -C was digested with SacI probed with a 3.3-kb *velB* fragment. Digestion of the NK17-  $\Delta ura3$  genome yielded a 6.6 kb band, whereas the  $\Delta velB$  had two bands, 4.5 and 2.3kb in length. Two bands, 7.7 and 2.3 kb were detected for complemented strain  $\Delta velB$ -C. (b) PCR verification for  $\Delta laeA$  mutants (top) and  $\Delta laeA$ -C strains (bottom). The expected size of PCR products with primer pairs *VelB(s)/Ura3(as)* and *VelB(as)/Ura3(s)* were 2315 bp (left) and 1991 bp (right) for  $\Delta velB$ , respectively. The anticipated length of PCR product with primer pair *LaeA-up-s/Hyg(R)* was 4262 bp for the complemented strain  $\Delta laeA$ -C, while no band was seen for  $\Delta laeA$ ; The predicted PCR product with primer pair *LaeA-down-as/ura3(s)* was 2520 bp in length for complemented strain, while 4582 bp for  $\Delta laeA$ .

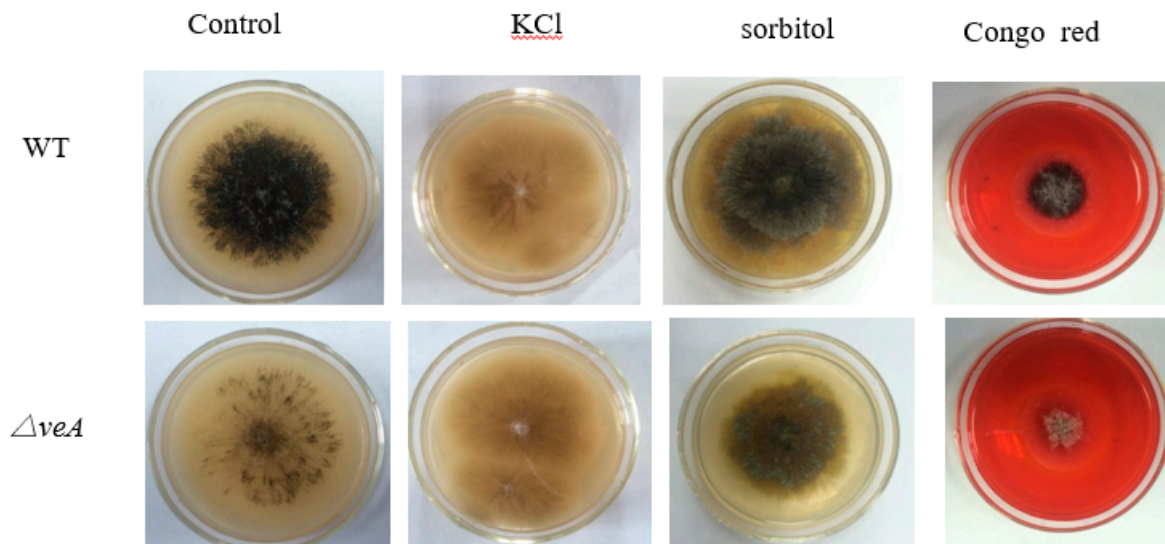

**Figure S9.** Sensitivity tests for NK17 and  $\Delta veA$  strains. The strains incubated at 28 °C for five days on MM plates supplemented with 1M KCl, 2 M sorbitol, or 0.04% Congo red.
